# Supplementary material for: Sediment shell-content diminishes current-driven sand rippledevelopment and migration
Source: Copernicus journal article supplement (doi:10.5194/esurf-2021-13), 2021-03-02
Supplement: Supplementary file 1 [file esurf-2021-13-supplement.pdf]

**Table S1**

Grain size characteristics of the sandy sediment fraction used in the experiments.

| <b>Sediment fraction</b> | <b>Grain size (<math>\mu\text{m}</math>)</b> | <b>SD</b> |
|--------------------------|----------------------------------------------|-----------|
| $D_{10}$                 | 239                                          | 3.9       |
| $D_{50}$                 | 352                                          | 1.3       |
| $D_{90}$                 | 520                                          | 10.7      |

**Table S2**

Representative measurements of the shell valves and fragments used in the experiments.

| <b>Shell type</b> | <b># samples</b> | <b>Length</b>     | <b>Width</b>      | <b>Height</b>    | <b>Weight</b>     |
|-------------------|------------------|-------------------|-------------------|------------------|-------------------|
| Valves            | 200              | 27.5 ( $\pm$ 4.5) | 23.6 ( $\pm$ 3.9) | 9.5 ( $\pm$ 2.3) | 2.3 ( $\pm$ 1.4)  |
| Fragments         | 455              | 18.2 ( $\pm$ 7.8) | 13 ( $\pm$ 6)     | 4.5 ( $\pm$ 2.6) | 0.74 ( $\pm$ 0.9) |

Length, width and height are in units of mm, while weight is in g. Height represents the thickness of the shell, from the umbra to the center hinge.

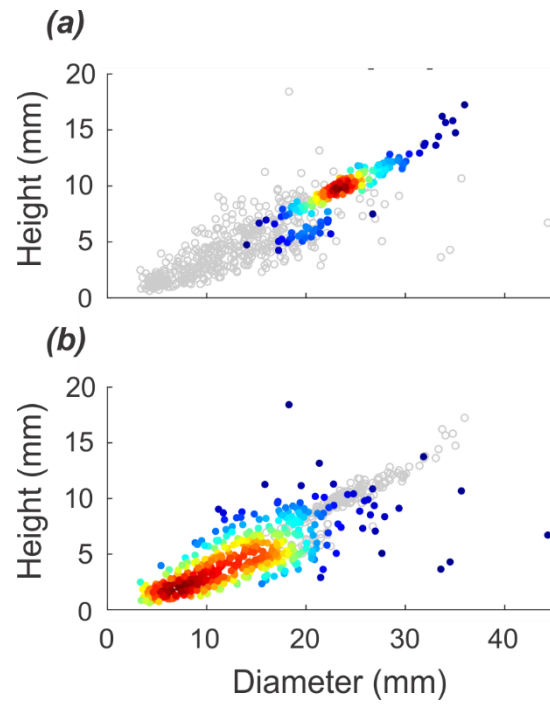

**Figure S1:** Measured shell height vs. diameter (thickness) for (a) whole shell valves and (b) shell fragments.
